# Supplementary material
Source: publisher figshare collection journal article supplement (https://acs.figshare.com/ndownloader/files/3813679)
Supplement: Supplementary file 1 [file 3813679]

**Supporting Information for**

**Rational Synthesis and Characterization of Dimolybdenum(II)**

**Compounds Bearing Fc-containing Ligands towards Modulation**

**of Electronic Coupling**

Xu-Min Cai,<sup>†</sup> Korbinian Riener,<sup>†</sup> Eberhardt Herdtweck,

Alexander Pöthig and Fritz E. Kühn\*

**Content:**

|                                                       |         |
|-------------------------------------------------------|---------|
| 01. Molecular Structures, Crystal Data and Refinement | S2-S3   |
| 02. NMR Data                                          | S4-S9   |
| 03. UV-Vis Data                                       | S9      |
| 04. CV and DPV Data                                   | S10     |
| 05. IR Data                                           | S11     |
| 06. TG-MS Data                                        | S12-S14 |
| 07. DFT Data                                          | S14-S19 |
| 08. References                                        | S19     |

## 01. Molecular Structures, Crystal Data and Refinement

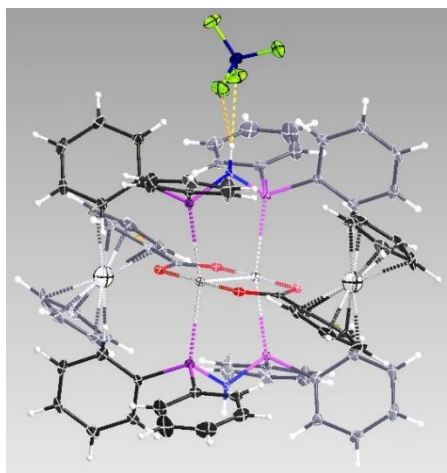

**Figure S1.** Molecular structure of compound **2a**.

The crystal structure could be refined up to a stage, where the structural proof is unambiguous. However, the limited quality of the crystal did not allow for a satisfying refinement (even after disordered solvent molecules had been treated with the PLATON/SQUEEZE procedure) for publication in the CCDC. We nevertheless provide the data of the crystal as well as preliminary refinement for compound **2a**.

### *Crystal data*

|                                 |                                                         |
|---------------------------------|---------------------------------------------------------|
| $C_{37}H_{33}BF_4Mo_2N_2O_2P_2$ | $F(000) = 1760$                                         |
| $M_r = 878.28$                  | $D_x = 1.509 \text{ Mg m}^{-3}$                         |
| $a = 14.1182 (8) \text{ \AA}$   | Mo $K\alpha$ radiation, $\lambda = 0.71073 \text{ \AA}$ |
| $b = 15.5748 (9) \text{ \AA}$   | Cell parameters from 9794 reflections                   |
| $c = 17.8932 (11) \text{ \AA}$  | $\mu = 0.79 \text{ mm}^{-1}$                            |
| $\alpha = 90^\circ$             | $T = 123(1) \text{ K}$                                  |
| $\beta = 100.722 (3)^\circ$     | $0.79 \times 0.55 \times 0.43 \text{ mm}$               |
| $\gamma = 90^\circ$             | space group: $P 2_1/n$ (No. 14)                         |
| $V = 3865.8 (4) \text{ \AA}^3$  |                                                         |
| $Z = 4$                         |                                                         |

### Data collection

|                                          |                                                                        |
|------------------------------------------|------------------------------------------------------------------------|
| Bruker Kappa-ApexII diffractometer       | $R_{\text{int}} = 0.025$                                               |
| Radiation source: fine-focus sealed tube | $\theta_{\text{max}} = 25.4^\circ$ , $\theta_{\text{min}} = 1.7^\circ$ |
| graphite                                 | $h = -16 \ 16$                                                         |
|                                          | $k = -18 \ 18$                                                         |
| 71871 measured reflections               | $l = -21 \ 21$                                                         |
| 7106 independent reflections             |                                                                        |
| 6567 reflections with $I > 2\sigma(I)$   |                                                                        |

### Refinement

|                                 |                                                                                      |
|---------------------------------|--------------------------------------------------------------------------------------|
| Refinement on $F^2$             | Hydrogen site location: inferred from neighbouring sites                             |
| Least-squares matrix: full      | H atoms treated by a mixture of independent and constrained refinement               |
| $R[F^2 > 2\sigma(F^2)] = 0.069$ | $w = 1/[\sigma^2(F_o^2) + (0.1197P)^2 + 55.3453P]$<br>where $P = (F_o^2 + 2F_c^2)/3$ |
| $wR(F^2) = 0.223$               | $(\Delta/\sigma)_{\text{max}} = 0.001$                                               |
| $S = 1.08$                      | $\Delta\rho_{\text{max}} = 2.53 \text{ e } \text{\AA}^{-3}$                          |
| 7106 reflections                | $\Delta\rho_{\text{min}} = -4.08 \text{ e } \text{\AA}^{-3}$                         |
| 452 parameters                  | Extinction correction: none                                                          |
| 0 restraints                    |                                                                                      |
| 0 constraints                   |                                                                                      |

## 02. NMR Data

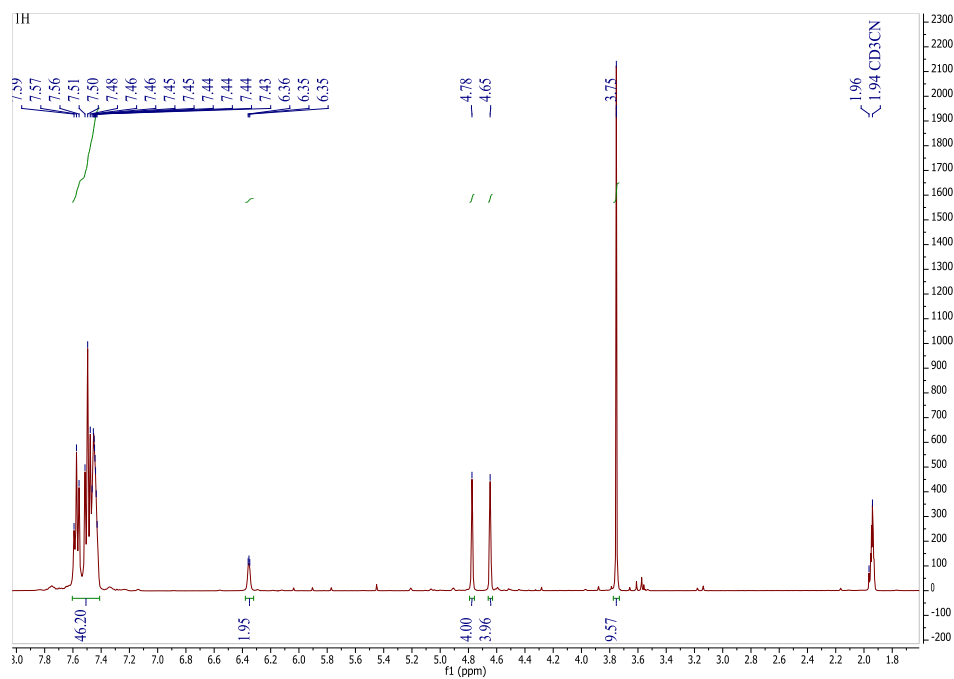

Figure S2. <sup>1</sup>H NMR spectrum of **2a** in CD<sub>3</sub>CN.

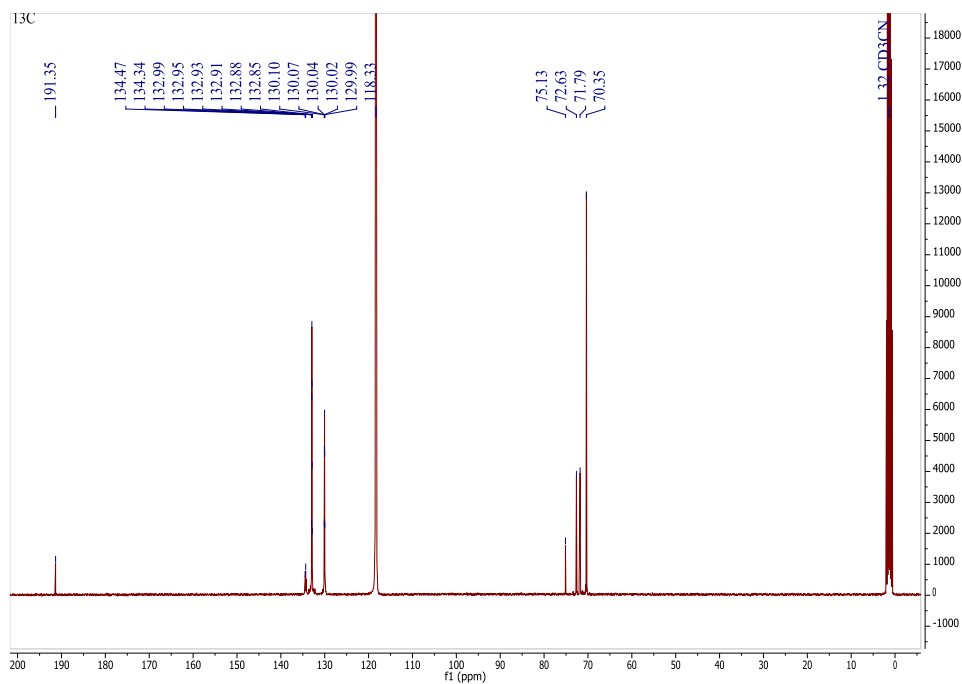

Figure S3. <sup>13</sup>C NMR spectrum of **2a** in CD<sub>3</sub>CN.

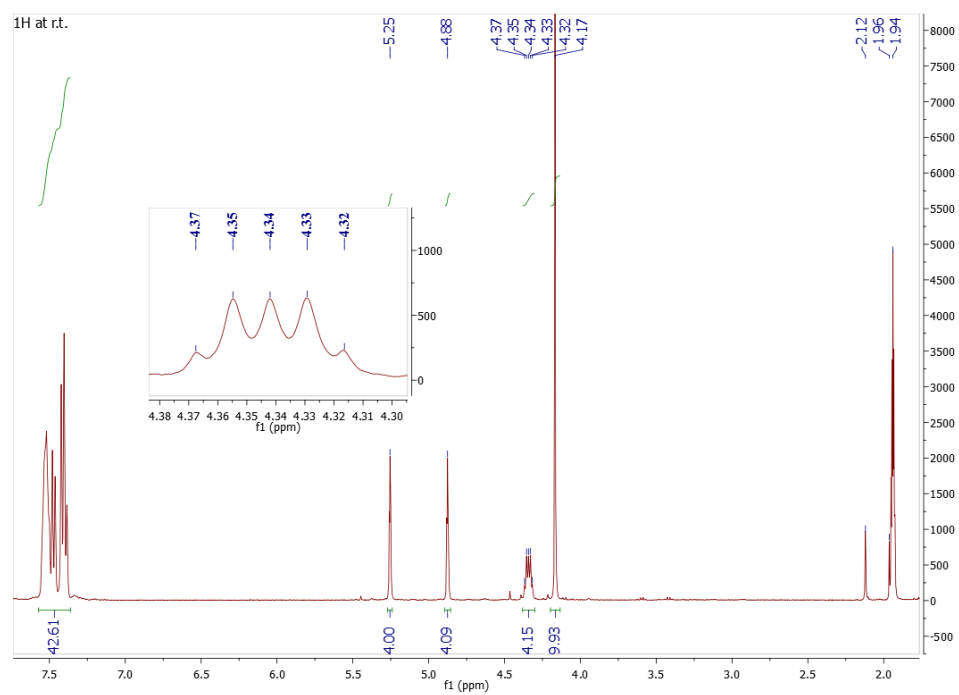

**Figure S4.** <sup>1</sup>H NMR spectrum of **2b** in CD<sub>3</sub>CN.

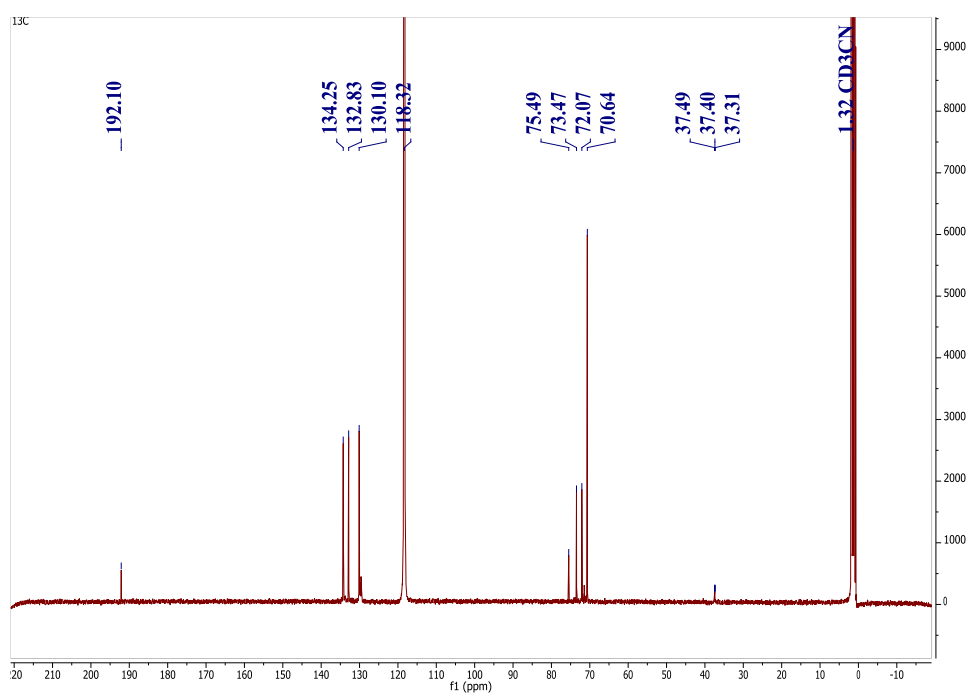

**Figure S5.** <sup>13</sup>C NMR spectrum of **2b** in CD<sub>3</sub>CN.

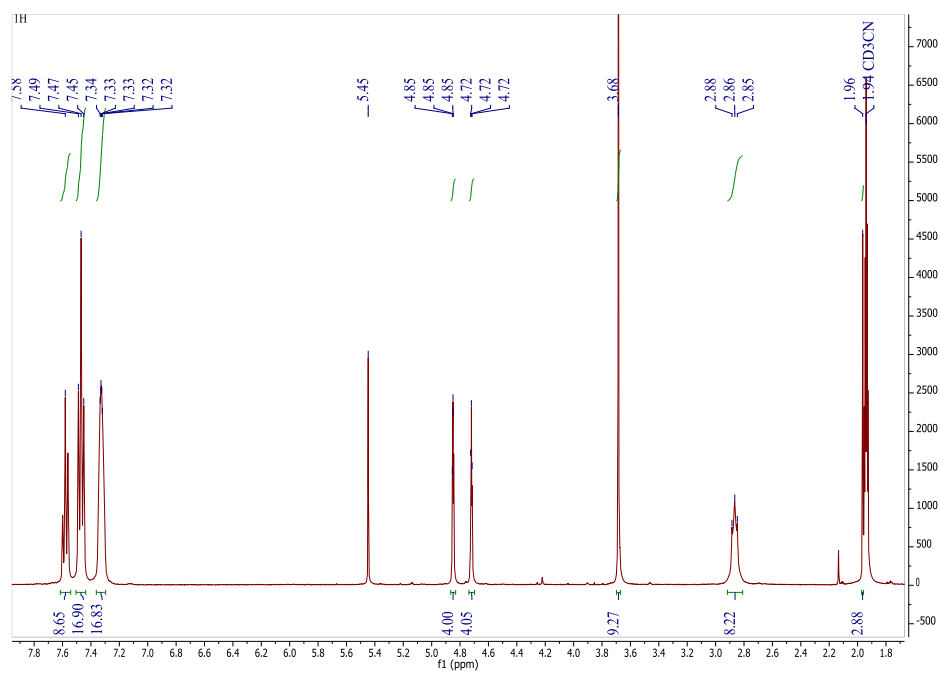

**Figure S6.** <sup>1</sup>H NMR spectrum of **2c** in CD<sub>3</sub>CN.

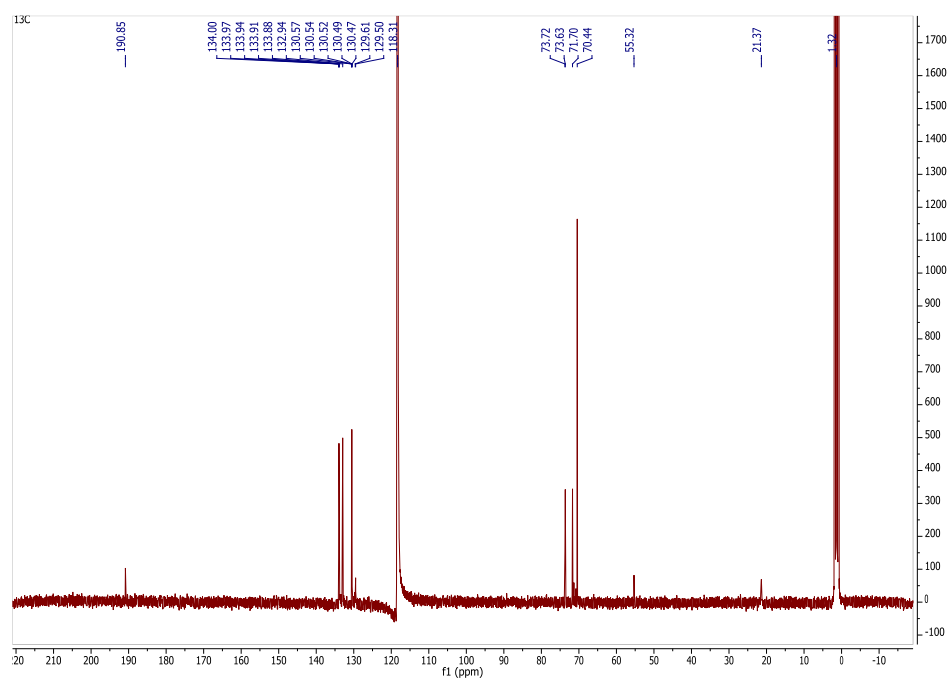

**Figure S7.** <sup>13</sup>C NMR spectrum of **2c** in CD<sub>3</sub>CN.

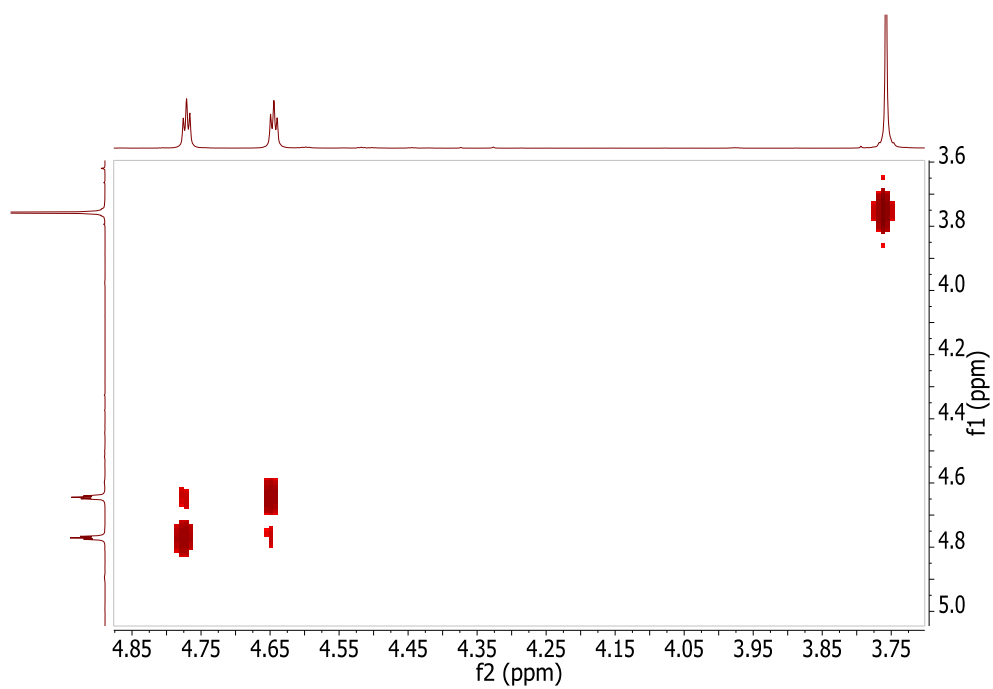

**Figure S8.** Excerpt from COSY spectrum of **2a** in  $\text{CD}_3\text{CN}$ .

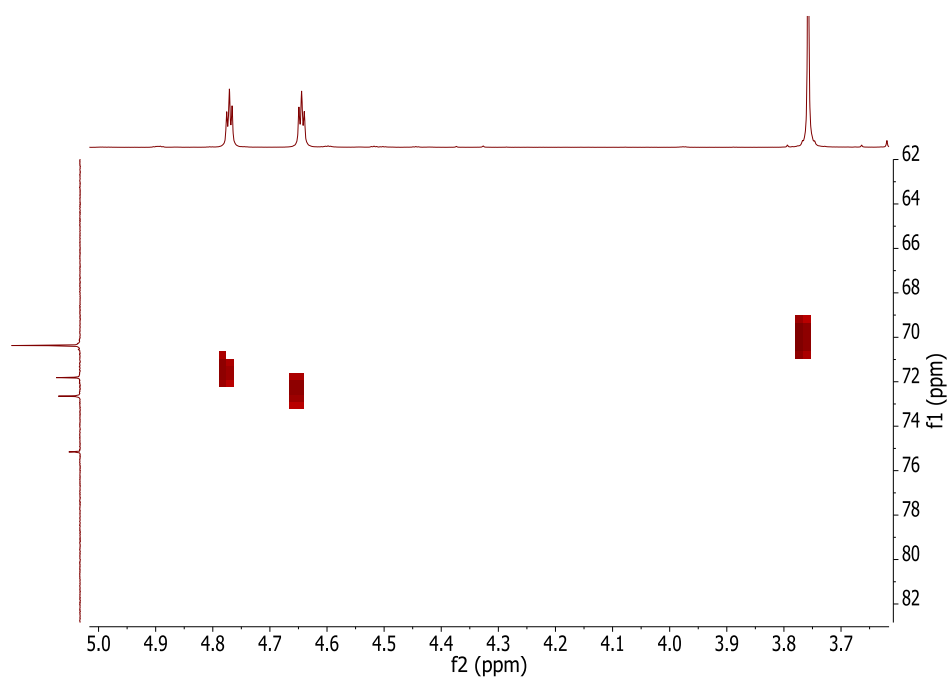

**Figure S9.** Excerpt from HSQC spectrum of **2a** in  $\text{CD}_3\text{CN}$ .

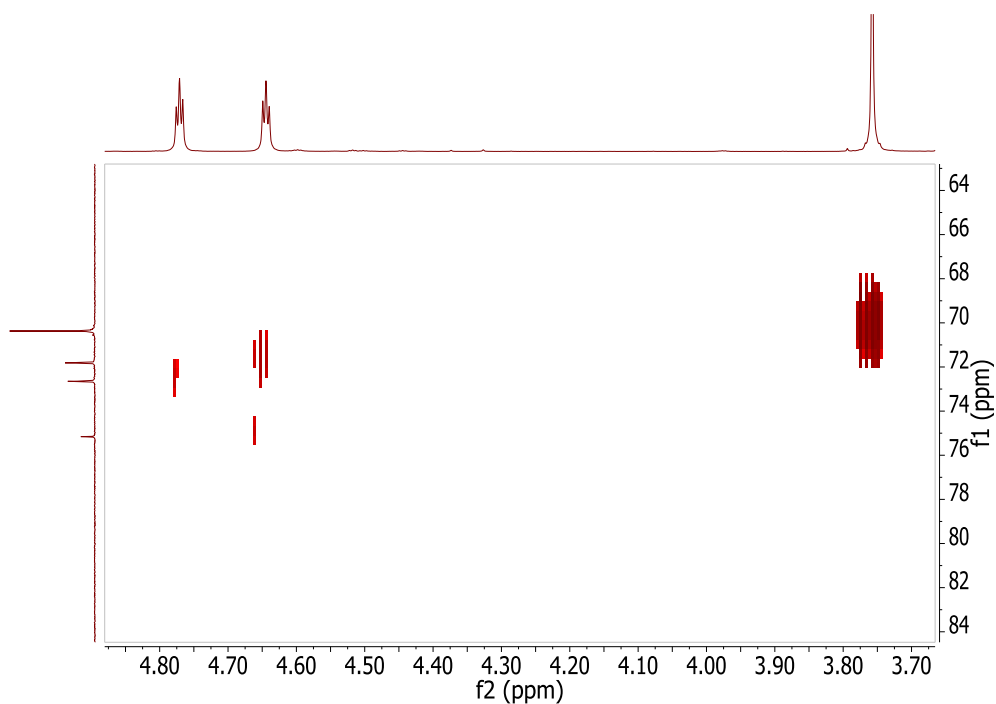

**Figure S10.** Excerpt from HMBC spectrum of **2a** in CD<sub>3</sub>CN.

**Table S1.** Selected NMR signals for comparison in ppm.

| Compd.                  | <sup>1</sup> H <sup>i</sup> (H <sub>a</sub> ; H <sub>b</sub> ; H <sub>c</sub> ) | Bridge- <sup>1</sup> H <sup>ii</sup> | <sup>31</sup> P |
|-------------------------|---------------------------------------------------------------------------------|--------------------------------------|-----------------|
| <i>trans</i> - <b>1</b> | 4.79; 5.20; 4.46                                                                |                                      |                 |
| DPPA                    |                                                                                 | 4.31                                 | 43.20           |
| <b>2a</b>               | 4.65; 4.78; 3.75                                                                | 6.33                                 | 78.45           |
| DPPM                    |                                                                                 | 2.92                                 | -23.14          |
| <b>2b</b>               | 4.88; 5.26; 4.17                                                                | 4.34                                 | 18.69           |
| DPPE                    |                                                                                 | 2.06                                 | -13.81          |
| <b>2c</b>               | 4.72; 4.85; 3.68                                                                | 2.86                                 | 20.72           |

<sup>i</sup> Proton signals on ferrocene rings. <sup>ii</sup> Proton signals on the bridged DPPX ligands.



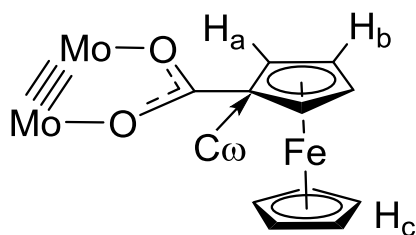

**Figure S11.** Labelled fragment for interpretation of NMR spectra.

### 03. UV-Vis Data

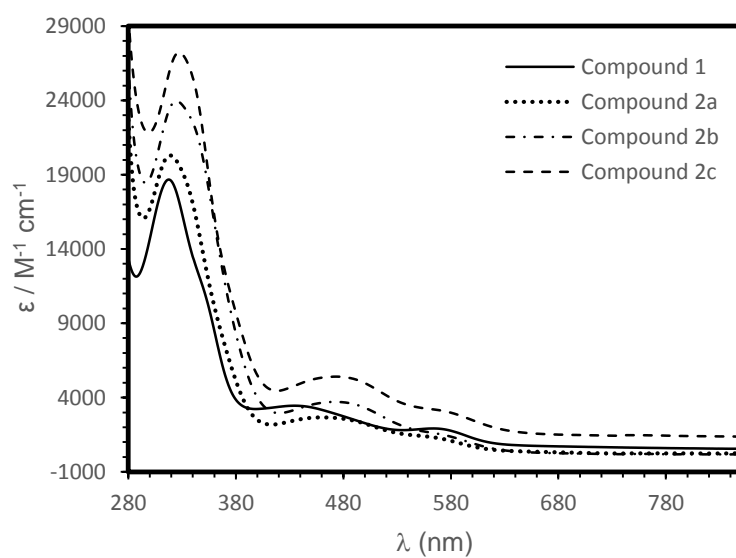

**Figure S12.** Full absorption spectra of compounds **1**, **2a-2c** in CH<sub>3</sub>CN.

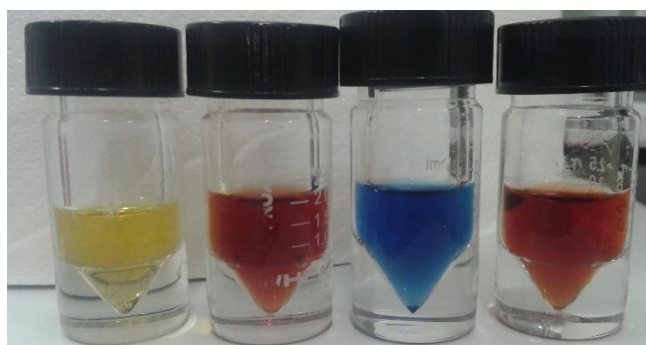

**Figure S13.** Color comparison of four compounds Fc-COOH, **1**, [Mo<sub>2</sub>(MeCN)<sub>10</sub>][BF<sub>4</sub>]<sub>4</sub> and **2a** in CH<sub>3</sub>CN from left to right.

#### 04. CV and DPV Data

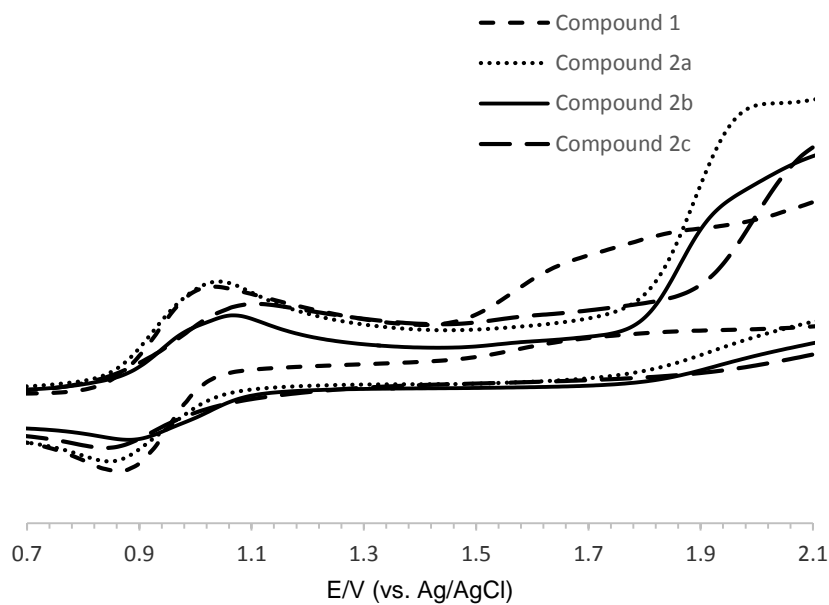

**Figure S14.** Cyclic voltammograms of compounds **1** and **2a-2c**. Results recorded in a 0.10 M degassed  $\text{CH}_3\text{CN}$  solution of  $[\text{Bu}_4\text{N}][\text{BF}_4]$  at a scan rate of 0.2 V/s.

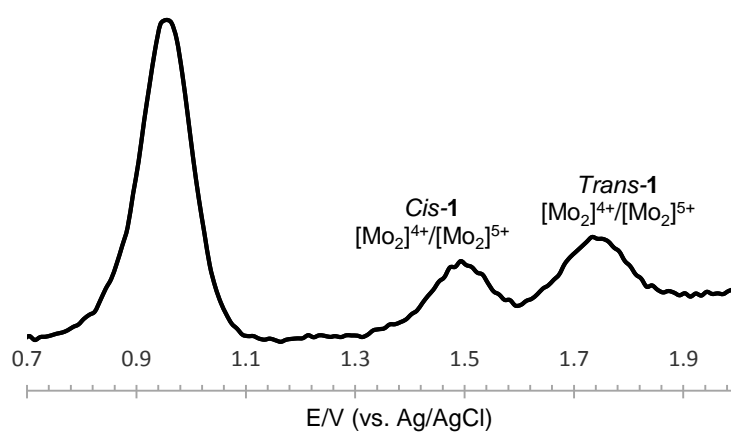

**Figure S15.** Differential pulse voltammogram of mixture *cis*- and *trans*-**1**. Results recorded in a 0.10 M degassed  $\text{CH}_3\text{CN}$  solution of  $(n\text{-Bu}_4)\text{NBF}_4$  at a scan rate of 0.2 V/s.

## 05. IR Data

Collected in Table S2 is the IR data of compounds **1** and **2a-2c** which is compared with relevant literature values. The lack of strong  $\nu_{\text{CN}}$  absorption bands in products **2a-2c** - as compared to **1** - is caused by almost full decoordination of equatorial MeCN ligands due to the crowded diphosphine substitution. No detailed descriptions have been found in literature to discuss the IR spectra difference after diphosphine coordination. Nevertheless, the bridging nature can be derived from the frequency difference ( $\Delta\nu$ ) between  $\nu_{\text{asym}}(\text{COO}^-)$  and  $\nu_{\text{sym}}(\text{COO}^-)$  bands of around  $100\text{ cm}^{-1}$ .<sup>1</sup> The  $\nu_{\text{NH}}$  absorption in compound **2a** at  $3237\text{ cm}^{-1}$  is slightly blue-shifted compared to  $3225\text{ cm}^{-1}$  in the free ligand DPPA. All  $\nu_{\text{BF}}$  absorption bands are within the common range, just about  $30\text{ cm}^{-1}$  blue-shifted as compared to **1**.

**Table S2.** Comparison of IR data.

| Compound                                                                                                                                            | $\nu_{\text{COO}} (\text{cm}^{-1})$ | $\nu_{\text{BF}} (\text{cm}^{-1})$ | Ref.         |
|-----------------------------------------------------------------------------------------------------------------------------------------------------|-------------------------------------|------------------------------------|--------------|
| <b>1</b>                                                                                                                                            | 1499, 1394                          | 1063, 1024                         | <sup>2</sup> |
| <i>trans</i> -[Mo <sub>2</sub> ( $\mu$ -O <sub>2</sub> CCH <sub>3</sub> ) <sub>2</sub> Cl <sub>2</sub> ( $\mu$ -dppma) <sub>2</sub> ]               | 1482, 1350                          |                                    | <sup>3</sup> |
| <i>trans</i> -[Mo <sub>2</sub> ( $\mu$ -CH <sub>3</sub> CONH)(dppm) <sub>2</sub> (NCCH <sub>3</sub> ) <sub>2</sub> ][BF <sub>4</sub> ] <sub>3</sub> | 1486, 1368                          | 1084, 1062                         | <sup>4</sup> |
| <b>2a</b>                                                                                                                                           | 1491, 1390                          | 1098                               | this paper   |
| <b>2b</b>                                                                                                                                           | 1484, 1398                          | 1093, 1078                         | this paper   |
| <b>2c</b>                                                                                                                                           | 1487, 1390                          | 1080, 1072                         | this paper   |

## 06. TG-MS Data

The masses observed via thermogravimetric analysis for compound **2a** with 11 (B), 17 (NH<sub>3</sub>), 19 (F), 22 (B<sub>2</sub>), 28 (CO), 31(P), 38 (F<sub>2</sub>), 41 (CH<sub>3</sub>CN), 44 (CO<sub>2</sub>), 65 (C<sub>5</sub>H<sub>5</sub>) and 78 (C<sub>6</sub>H<sub>6</sub>) show full decomposition of the molecule (acetonitrile originates from residual axially coordinated ligands), indicating that the residue is mainly of metallic nature (molybdenum and iron). A similar decomposition can be observed for both compounds **2b** and **2c**. The residual mass of around 17% in compound **2a** (Figure S16) is consistent with the calculated value for the metallic moieties of 18.7%. However, both the residual masses of 35% and 24% in compounds **2b** and **2c** are higher than calculated with 18.8% and 18.2% for the metallic moieties, respectively (Figures S17 and S18). Compared to precursor **1**, TG-MS analysis of **2a** shows the mass losses at relatively high temperature ranges of 300-340 and 440-520 °C (the mass losses of **1** between 100-250 and 400-500 °C).<sup>2</sup> Similar mass loss trends are observed in both compounds **2b** and **2c**. More specifically, TG-MS of **2a** shows that the remaining axially-coordinated acetonitrile ligands at 310-360 and 400-600 °C, which are around 150 °C higher than for those in **1** (150-250 and 400-500 °C). The same trend can be seen in the CO<sub>2</sub> peak maxima of the MS curve at around 330, 489 and 665 °C, which are again higher than for those in **1** (218, 438 and 640 °C). Based on the obtained data, diphosphine substitution results in increased temperature stability, which can be seen in all examined compounds **2b** and **2c**. Both **2b** and **2c** lose acetonitrile ligands at temperatures of 380-420/500-540 °C and 300-400/460-520 °C, respectively. The release of CO<sub>2</sub> in **2b** and **2c** proceeds in steps and starts at 380/512 and 360/500 °C,

respectively, proving a higher temperature stability of the carboxylate ligand compared to **1**, where CO<sub>2</sub> is already released in a small amount at around 218 °C. So in general, phosphine coordination leads to higher complex stability.

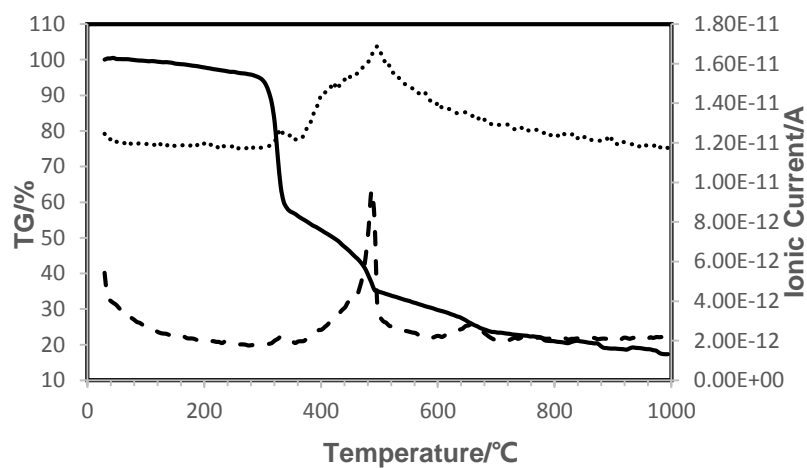

**Figure S16.** TG (solid) and MS curves (round dot for acetonitrile, dash for CO<sub>2</sub>) of compound **2a**.

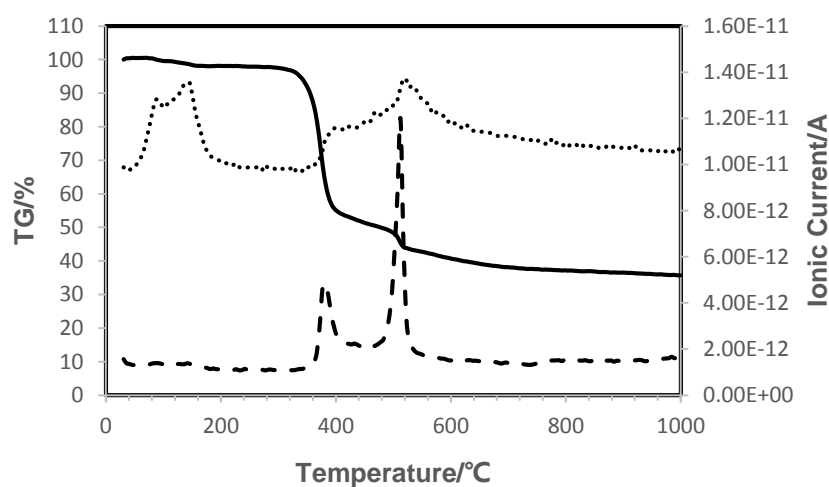

**Figure S17.** TG (solid) and MS curves (round dot for acetonitrile, dash for CO<sub>2</sub>) of compound **2b**.

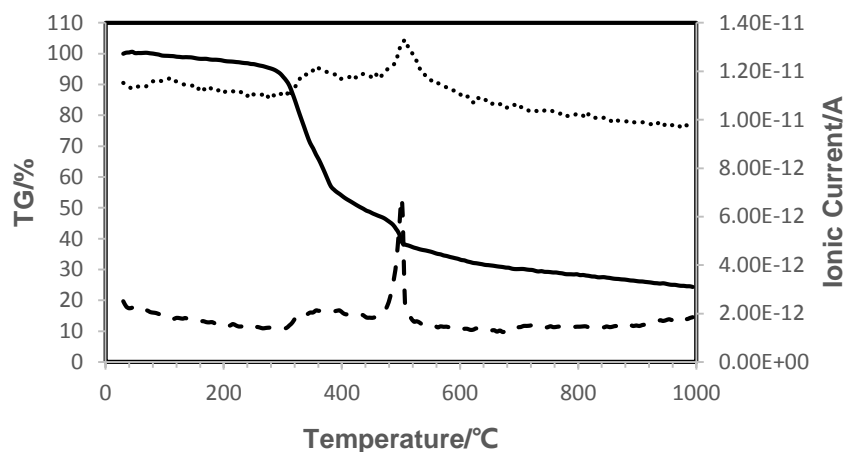

**Figure S18.** TG (solid) and MS curves (round dot for acetonitrile, dash for CO<sub>2</sub>) of compound **2c**.

## 07. DFT Data

All Cartesian atomic coordinates for each calculated molecule can be found in the separate plain-text xyz-file.

### Optimized Geometries and Energies

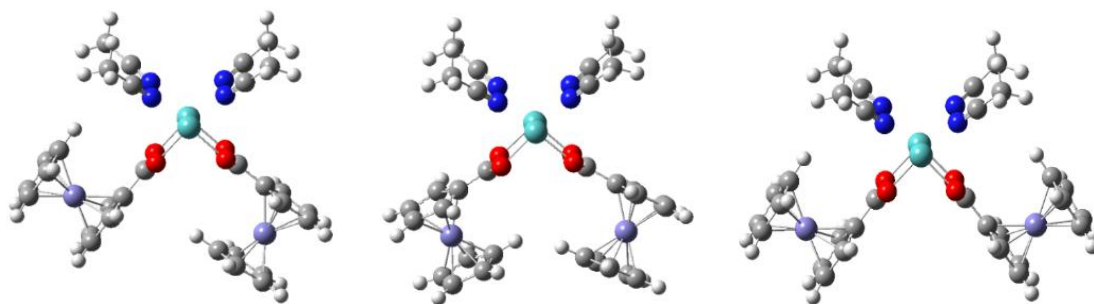

**Figure S19.** Computed structures of precursor **1** (ground state, charge: +2, multiplicity: singlet): Compound **1** (left), Fc units head-to-head as **1\_IN** (middle) and opposite to each other as **1\_OUT** (right).

**Table S3.** Ground state energies of three possible species of precursor **1** in solution.

| Compound     | HF [Hartree] | $\Delta$ HF<br>[kcal/mol] | G [Hartree]  | $\Delta$ G<br>[kcal/mol] |
|--------------|--------------|---------------------------|--------------|--------------------------|
| <b>1</b>     | -4344.513586 | 0.000                     | -4344.06296  | 0.000                    |
| <b>1_IN</b>  | -4344.51173  | 1.165                     | -4344.05888  | 2.560                    |
| <b>1_OUT</b> | -4344.510995 | 1.626                     | -4344.058614 | 2.727                    |

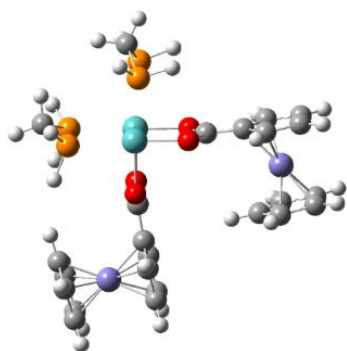

Compound **2b\_H\_CIS**

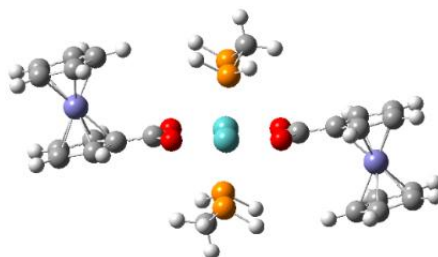

Compound **2b\_H\_TRANS**

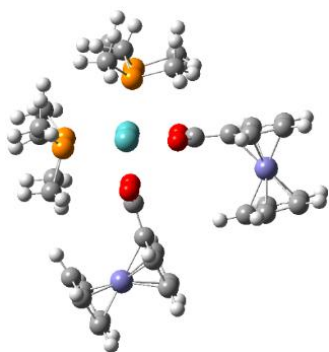

Compound **2b\_Me\_CIS**

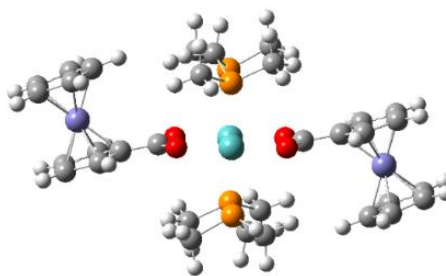

Compound **2b\_Me\_TRANS**

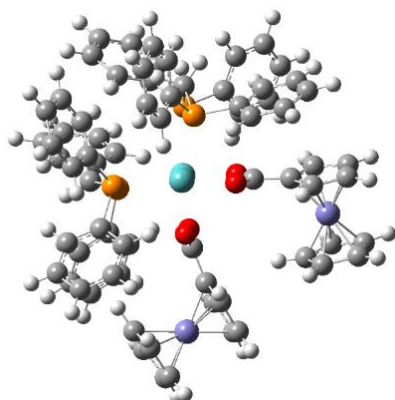

Compound **2b\_Ph\_CIS**

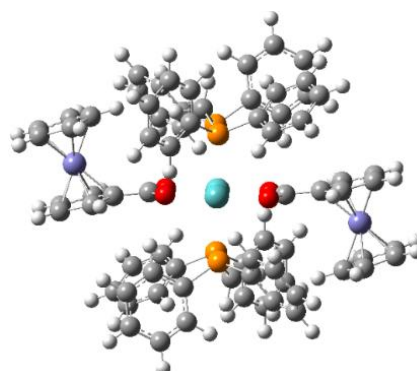

Compound **2b**

**Figure S20.** *Cis*- and *trans*-paired structures with R groups from H to methyl to phenyl (ground state, charge: +2, multiplicity: singlet; **2b** refers to compound in the manuscript, would otherwise be named compound **2\_Ph\_TRANS**).

**Table S4.** Ground state energies for all diphosphine-coordinated complexes with R groups from H to methyl to phenyl.

| Compound           | HF [Hartree]  | $\Delta H F_{cis-trans}$<br>[kcal/mol] | G [Hartree]  | $\Delta G_{cis-trans}$<br>[kcal/mol] |
|--------------------|---------------|----------------------------------------|--------------|--------------------------------------|
| <b>2b_H_CIS</b>    | -5262.2624866 | -0.253                                 | -5261.8482   | 1.116                                |
| <b>2b_H_TRANS</b>  | -5262.2620830 |                                        | -5261.8500   |                                      |
| <b>2b_Me_CIS</b>   | -5576.7520599 | 10.166                                 | -5576.116162 | 14.602                               |
| <b>2b_Me_TRANS</b> | -5576.7682604 |                                        | -5576.139431 |                                      |
| <b>2b_Ph_CIS</b>   | -7110.0434058 | 20.519                                 | -7109.016652 | 23.400                               |
| <b>2b</b>          | -7110.0761043 |                                        | -7109.053943 |                                      |

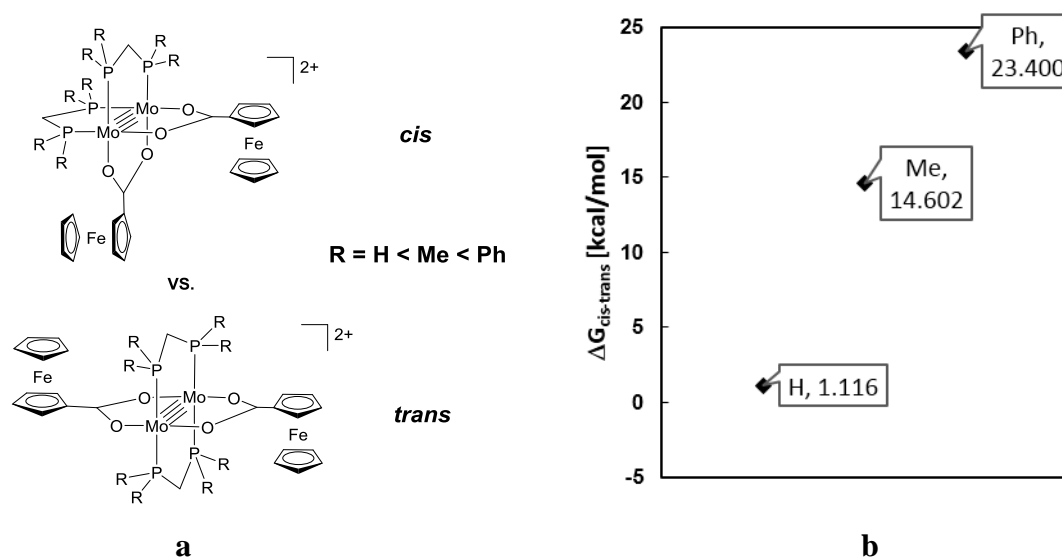

**Figure S21.** a) *Cis*- and *trans*-structures via diphosphine coordination. b)  $\Delta G_{cis-trans}$  diagram for diphosphine-coordinated complexes with R groups from H to methyl to phenyl.



## MO Energies

**Table S5.** Molecular orbital energies for compounds **1** and **2a-c**.

| in eV  | Compound <b>1</b> | Compound <b>2a</b> | Compound <b>2b</b> | Compound <b>2c</b> |
|--------|-------------------|--------------------|--------------------|--------------------|
| LUMO+5 | -5,96             | -5,47              | -5,50              | -5,36              |
| LUMO+4 | -6,04             | -5,66              | -5,66              | -5,50              |
| LUMO+3 | -6,12             | -6,01              | -5,85              | -5,63              |
| LUMO+2 | -6,86             | -6,10              | -5,88              | -5,90              |
| LUMO+1 | -6,97             | -6,15              | -6,01              | -6,10              |
| LUMO   | -8,08             | -7,21              | -7,18              | -7,05              |
| HOMO   | -8,93             | -8,65              | -8,73              | -8,65              |
| HOMO-1 | -8,98             | -8,65              | -8,76              | -8,65              |
| HOMO-2 | -9,14             | -8,65              | -8,76              | -8,65              |
| HOMO-3 | -9,17             | -8,71              | -8,79              | -8,71              |
| HOMO-4 | -9,33             | -9,06              | -9,14              | -9,06              |
| HOMO-5 | -9,55             | -9,06              | -9,17              | -9,09              |

## TD-DFT Data

HOMO corresponds to MO#174 in compound **1**, to MO#332 in compounds **2a/b** and to MO#340 in compound **2c**.

**Table S6.** Predicted excited states with respective oscillation strengths, transitions and contributions for compounds **1** and **2a-c**.

|                    | $\lambda$ [nm] | O. S.  | E [eV] | from MO# | to MO# | Contribution |
|--------------------|----------------|--------|--------|----------|--------|--------------|
| Compound <b>1</b>  | 409.5          | 0.0126 | 3.028  | 171      | 181    | 66%          |
|                    |                |        |        | 173      | 184    | 12%          |
|                    | 492.4          | 0.0269 | 2.518  | 171      | 180    | 50%          |
|                    |                |        |        | 171      | 184    | 17%          |
|                    |                |        |        | 171      | 195    | 20%          |
|                    |                |        |        | 172      | 192    | 15%          |
|                    | 502.1          | 0.0351 | 2.469  | 170      | 181    | 17%          |
|                    |                |        |        | 173      | 181    | 51%          |
|                    |                |        |        | 173      | 184    | 21%          |
|                    |                |        |        | 173      | 186    | 17%          |
| Compound <b>2a</b> | 484.4          | 0.0431 | 2.560  | 329      | 342    | 21%          |
|                    |                |        |        | 329      | 344    | 23%          |
|                    |                |        |        | 329      | 363    | 16%          |
|                    |                |        |        | 330      | 340    | 28%          |
|                    |                |        |        | 332      | 340    | 37%          |
|                    |                |        |        | 332      | 361    | 11%          |
|                    | 584.6          | 0.0118 |        | 326      | 333    | 69%          |
|                    |                |        |        |          |        |              |
| Compound <b>2b</b> | 485.8          | 0.0461 | 2.552  | 327      | 342    | 12%          |
|                    |                |        |        | 329      | 344    | 15%          |
|                    |                |        |        | 330      | 338    | 19%          |
|                    |                |        |        | 330      | 356    | 10%          |
|                    |                |        |        | 331      | 357    | 13%          |
|                    |                |        |        | 332      | 338    | 39%          |
|                    |                |        |        | 332      | 359    | 16%          |
|                    | 577.4          | 0.0124 |        | 326      | 333    | 69%          |
| Compound <b>2c</b> | 483.4          | 0.0390 | 2.565  | 335      | 350    | 12%          |
|                    |                |        |        | 336      | 346    | 11%          |
|                    |                |        |        | 337      | 350    | 26%          |
|                    |                |        |        | 337      | 368    | 14%          |
|                    |                |        |        | 339      | 365    | 11%          |
|                    |                |        |        | 340      | 346    | 39%          |
|                    |                |        |        | 340      | 367    | 13%          |
|                    | 588.2          | 0.0171 | 2.108  | 334      | 341    | 67%          |
|                    |                |        |        | 340      | 342    | 13%          |

## Additional MO Plots

Compound **2b**: HOMO (ground state, charge: +2, multiplicity: singlet)

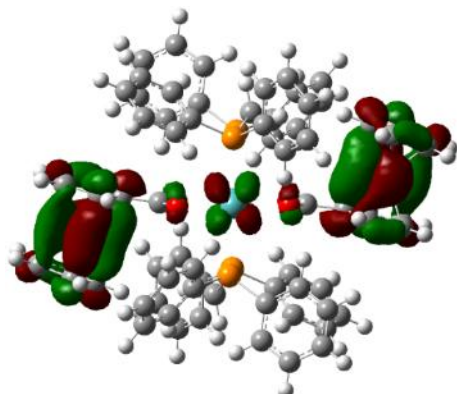

Compound **2c**: HOMO (ground state, charge: +2, multiplicity: singlet)

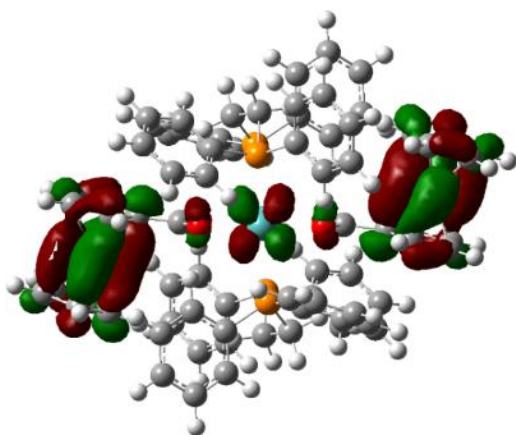

## 08. References

- (1) Socrates, G. *Infrared and Raman Characteristic Group Frequencies: Tables and Charts*; Wiley, 2004, 133-134.
- (2) Cai, X.-M.; Hühne, D.; Köberl, M.; Cokoja, M.; Pöhig, A.; Herdtweck, E.; Haslinger, S.; Herrmann, W. A.; Kühn, F. E. *Organometallics* **2013**, 32, 6004-6011.
- (3) Cotton, F. A.; Kühn, F. E.; Yokochi, A. *Inorg. Chim. Acta* **1996**, 252, 251-256.
- (4) Cotton, F. A.; Daniels, L. M.; Haefner, S. C.; Kühn, F. E. *Inorg. Chim. Acta* **1999**, 287, 159-166.
